# Supplementary material for: Genetic architecture of serum PFAS accumulation and its neurotoxicity in young urban adults
Source: Research Square preprint supplement (doi:10.21203/rs.3.rs-8139813/v1), 2026-02-10
Supplement: Supplementary file 1 [file 80239b108972414292966669.xlsx]

## Sheet: Supplementary Table 1
Supplementary Table 1. Inclusion and exclusion criteria for the CHIMGEN participants.
Category	Item	Action
Demographics	Age of 18-30 years	Inclusion
	Chinese Han without other ethnic ancestors in recent three generations	Inclusion
	Right-handedness confirmed by the handedness questionnaire	Inclusion
	Relatives have not participated in this study	Inclusion
Medical histories	Neuropsychiatric diseases	Exclusion
	Consciousness loss for more than 5 minutes	Exclusion
	Brain injury or neurosurgery	Exclusion
	Major physical illnesses (heart disease, nephritis, diabetes, etc.)	Exclusion
	Visible brain abnormalities on previous MRI examinations	Exclusion
	Neuropsychiatric diseases in three generation relatives	Exclusion
Conditions	Alcohol or drug abuse or dependence	Exclusion
	The total number of cigarettes so far is more than 20	Exclusion
	Currently with any medication (including contraceptives)	Exclusion
	Taking drugs that might affect the brain	Exclusion
	Using sedative hypnotics within one month	Exclusion
	Color blindness or difficulty in color discrimination	Exclusion
	Women in pregnancy or in the menstrual period	Exclusion
	Strenuous exercise or consumption of stimulating strong tea, caffeine, or alcoholic beverages on the day of the experiment	Exclusion
	Without enough sleep (< 7 hours) at the night before the experiment	Exclusion
MRI contraindications	Metal implants	Exclusion
	Electronic implants (e.g., pacemakers)	Exclusion
	Severe claustrophobia	Exclusion
Abbreviations: CHIMGEN, Chinese Imaging Genetics ; MRI, magnetic resonance imaging.

## Sheet: Supplementary Table 2
Supplementary Table 2. Description of 21 per-and polyfluoroalkyl substances (PFASs).
Major category	Compound name	Abbreviation	Chemical formula	Detection parameters
				Monitoring transition	Declustering potential (V)	Collison energy (V)
Perfluoroalkyl carboxylic acid (PFCA)	Perfluorobutanoic acid	PFBA	C4HF7O2	212.8 > 168.9	34	12
	Perfluoropentanoic acid	PFPeA	C5HF9O2	262.9 > 219.0	37	12
	Perfluorohexanoic acid	PFHxA	C6HF11O2	312.8 > 269.0	36	13
	Perfluoroheptanoic acid	PFHpA	C7HF13O2	363.0 > 319.0	32	13
	Perfluorooctanoic acid	PFOA	C8HF15O2	412.7 > 368.9	32	14
	Perfluorononanoic acid	PFNA	C9HF17O2	462.9 > 419.2	50	15
	Perfluorodecanoic acid	PFDA	C10HF19O2	513.1 > 469.1	50	16
	Perfluoroundecanoic acid	PFUnDA	C11HF21O2	563.0 > 519.2	53	17
	Perfluorododecanoic acid	PFDoA	C12HF23O2	613.0 > 569.2	60	18
	Perfluorotridecanoic acid	PFTrDA	C13HF25O2	663.0 > 619.0	55	18
	Perfluorotetradecanoic acid	PFTeDA	C14HF27O2	713.0 > 669.0	70	19
	Perfluorohexadecanoic acid	PFHxDA	C16HF31O2	813.0 > 769.0	65	21
	Perfluorooctadecanoic acid	PFODA	C18HF35O2	913.0 > 869.0	67	21
Perfluorosulfonates acid (PFSA)	Perfluorobutane sulfonic acid	PFBS	C4HF9O3S	299.0 > 80.0*, 99.0	65	56
	Perfluoropentane sulfonic acid	PFPeS	C5HF11O3S	348.9 > 80.0*, 99.0	95	64
	Perfluorohexane sulfonate	PFHxS	C6HF13O3S	399.0 > 80.0*, 99.0	80	74
	Perfluoroheptane sulfonic acid	PFHpS	C7HF15O3S	449.0 > 80.0*, 99.0	120	80
	Perfluorooctane sulfonic acid	PFOS	C8HF17O3S	498.9 > 80.0*, 99.0	82	90
	Perfluorononane sulfonic acid	PFNS	C9HF19O3S	548.9 > 80.0*, 99.0	120	90
	Perfluorodecane sulfonic acid	PFDS	C10HF21O3S	599.1 > 80.0*, 99.0	100	90
	Perfluorododecanoic acid	PFDoS	C12HF23O2	699.1 > 80.0*, 99.0	110	100
Note: PFSA concentrations are detected using two transition thresholds (> 80.0 and > 99.0), of which > 80.0 (*) is used as the reference.

## Sheet: Supplementary Table 3
Supplementary Table 3. Quality control measures during detection for 21 PFASs.
Compound	LOD (ng/mL)	LOQ (ng/mL)	RR2 (%)		RR5 (%)		Sample size	DR (%)
			Mean	SD	Mean	SD
PFBA	0.03	0.6	83.83	2.52	76	2.42	3581	52.46
PFPeA	0.004	0.04	86.33	13.29	82.13	6.36	3552	52.04
PFHxA	0.004	0.08	109.83	7.78	99.6	0.87	3801	55.68
PFHpA	0.004	0.06	79.5	7	69.8	4.5	6131	89.82
PFOA	0.003	0.05	110.67	5.97	100.67	4.82	6823	99.96
PFNA	0.002	0.02	87.17	4.8	78.6	1.4	6822	99.94
PFDA	0.001	0.009	82	3.97	74.07	0.83	6802	99.65
PFUnDA	0.002	0.01	91.33	1.61	82.33	3.33	6809	99.75
PFDoA	0.003	0.03	101	5.29	96.73	0.31	5460	79.99
PFTrDA	0.001	0.02	74	4.82	68.67	5.19	5969	87.45
PFTeDA	0.001	0.005	97	7.05	92.87	2.14	3156	46.23
PFHxDA	0.001	0.01	73.67	2.75	66.87	2.8	129	1.89
PFODA	0.001	0.02	87.83	4.65	80.87	1.27	50	0.73
PFBS	0.002	0.05	76.83	2.52	74.93	5.1	5484	80.34
PFPeS	0.002	0.05	77.5	1.8	72.8	2.75	5428	79.52
PFHxS	0.004	0.02	72.67	0.76	66.8	1.4	6814	99.82
PFHpS	0.006	0.02	84.67	2.31	78	2.6	6383	93.51
PFOS	0.003	0.03	112.17	9.36	112.4	7.71	6790	99.47
PFNS	0.001	0.01	88.33	6.37	79.53	4.9	5256	77
PFDS	0.001	0.04	80.5	4.27	75.73	4.58	157	2.3
PFDoS	0.002	0.01	100.67	4.75	94	3.14	72	1.05
Abbreviations: DR, detection rate; LOD, limit of detection; LOQ, limit of quantification; PFASs, per-and polyfluoroalkyl substances; RR2 and RR5, triplicate recovery experiments were performed with calf serum at a spiked concentration of 2ng/ml and 5ng/ml, separately; SD, standard deviation.
Note: We include 13 PFASs with detection rate above 75% in the further analyses, which are marked in red.

## Sheet: Supplementary Table 4
Supplementary Table 4. Summary statistics of serum concentrations (ng/mL) of 13 PFASs.
Number	Compound	Sample size	Mean	Median	SD	Min	Max
1	PFHpA	6131	0.038	0.025	0.145	0.004	10.64
2	PFOA	6823	5.959	3.11	13.747	0.007	260
3	PFNA	6822	0.764	0.523	0.754	0.017	10.844
4	PFDA	6802	0.398	0.263	0.525	0.003	17.039
5	PFUnDA	6809	0.323	0.23	0.322	0.003	4.502
6	PFDoA	5460	0.033	0.022	0.036	0.003	0.662
7	PFTrDA	5969	0.042	0.03	0.043	0.002	0.636
8	PFBS	5484	0.022	0.013	0.091	0.002	6.214
9	PFPeS	5428	0.295	0.162	0.313	0.002	3.705
10	PFHxS	6814	0.418	0.275	0.639	0.004	21.158
11	PFHpS	6383	0.112	0.076	0.165	0.006	6.646
12	PFOS	6790	3.743	2.76	4.535	0.014	117.8
13	PFNS	5256	0.01	0.008	0.018	0.001	0.991
Abbreviations: CHIMGEN, Chinese Imaging Genetics; Min, minimum value; Max, maximum value; PFASs, per-and polyfluoroalkyl substances; SD, standard deviation.

## Sheet: Supplementary Table 5
Supplementary Table 5. Demographics of the study population in each genome-wide association analysis with PFAS accumulation.
Compound	Discovery dataset									Replication dataset							Total sample										Sensitivity analysis in the total sample, additionally controlling for lifetime SES, occupation, breastfeeding, urbanicity, air pollution (PM2.5) and serum levels of four heavy metals
	Sample size (n)	Age (years)		Sex (male/female)	Education (years)		Batch1 (n)	Batch2 (n)	Batch3 (n)	Sample size (n)	Age (years)		Sex (male/female)	Education (years)		Batch4 (n)	Sample size (n)	Age (years)		Sex (male/female)	Education (years)		Batch1 (n)	Batch2 (n)	Batch3 (n)	Batch4 (n)	Sample size (n)	Age (years)		Sex (male/female)	Education (years)		Batch1 (n)	Batch2 (n)	Batch3 (n)	Batch4 (n)
		Mean	SD		Mean	SD					Mean	SD		Mean	SD			Mean	SD		Mean	SD						Mean	SD		Mean	SD
PFHpA	4708	23.6789	2.45936	1,661/3,047	16.4701	2	1971	1404	1333	1423	23.524	2.5025	456/967	16.421	2.04219	1423	6131	23.6608	2.48816	2,129/4,002	16.4441	2.01312	1971	1404	1333	1423	4252	23.4687	2.3963	1,442/2,810	16.3008	1.94547	1479	918	853	1002
PFOA	5325	23.7222	2.46974	1,923/3,402	16.5038	2.0026	2001	1498	1826	1498	23.5442	2.48319	486/1,012	16.4347	2.03173	1498	6823	23.7184	2.45861	2,425/4,398	16.5004	1.98293	2001	1498	1826	1498	4688	23.5127	2.41066	1,633/3,055	16.3279	1.95383	1502	975	1150	1061
PFNA	5324	23.7228	2.46968	1,922/3,402	16.5037	2.00202	2001	1497	1826	1498	23.5416	2.48045	487/1,011	16.4347	2.03173	1498	6822	23.7196	2.45826	2,425/4,397	16.501	1.98232	2001	1497	1826	1498	4687	23.5133	2.4104	1,634/3,053	16.3282	1.9535	1502	974	1150	1061
PFDA	5304	23.7242	2.47255	1,918/3,386	16.5044	2.00256	1999	1493	1812	1498	23.5416	2.48045	487/1,011	16.4347	2.03173	1498	6802	23.7206	2.46048	2,421/4,381	16.5015	1.98269	1999	1493	1812	1498	4676	23.5145	2.41211	1,633/3,043	16.3283	1.95503	1501	974	1140	1061
PFUnDA	5312	23.7234	2.47093	1,918/3,394	16.506	2.00254	1999	1493	1820	1497	23.5443	2.47907	486/1,011	16.4377	2.02916	1497	6809	23.7199	2.4594	2,421/4,388	16.5028	1.98284	1999	1493	1820	1497	4679	23.5132	2.41114	1,632/3,047	16.329	1.95449	1501	971	1147	1060
PFDoA	4058	23.7614	2.45695	1,419/2,639	16.5394	1.99615	1835	1388	835	1402	23.5509	2.47412	455/947	16.451	2.02489	1402	5460	23.7604	2.44908	1,875/3,585	16.5368	1.97396	1835	1388	835	1402	3784	23.5452	2.39099	1,275/2,509	16.3593	1.93973	1372	906	520	986
PFTrDA	4475	23.7873	2.47027	1,569/2,906	16.5612	2.01365	1847	1335	1293	1494	23.543	2.48111	485/1,099	16.4406	2.0272	1494	5969	23.7685	2.45747	2,071/3,898	16.545	1.98837	1847	1335	1293	1494	4123	23.5592	2.40513	1,404/2,719	16.3693	1.95593	1382	877	806	1058
PFBS	4001	23.64	2.45108	1,430/2,571	16.4602	2.00058	1847	1336	818	1483	23.5404	2.47397	479/1,004	16.4364	2.02682	1483	5484	23.6603	2.44162	1,925/3,559	16.4702	1.97717	1847	1336	818	1483	3861	23.4421	2.39253	1,326/2,535	16.2888	1.95363	1387	870	554	1050
PFPeS	4173	23.6574	2.44115	1,504/2,669	16.4641	1.99173	2000	1492	681	1255	23.4754	2.50904	408/847	16.3653	2.04862	1255	5428	23.6751	2.43235	1,916/3,512	16.4769	1.97123	2000	1492	681	1255	3798	23.4681	2.36947	1,301/2,497	16.3014	1.9361	1501	972	435	890
PFHxS	5316	23.7226	2.47089	1,919/3,397	16.5041	2.0028	2001	1494	1821	1498	23.5406	2.48054	488/1,010	16.4354	2.03175	1498	6814	23.7191	2.45953	2,422/4,392	16.5013	1.98292	2001	1494	1821	1498	4686	23.513	2.41111	1,633/3,053	16.3283	1.95371	1502	974	1149	1061
PFHpS	4888	23.692	2.46124	1,748/3,140	16.4783	1.99334	2001	1499	1388	1495	23.544	2.48172	486/1,009	16.4349	2.03333	1495	6383	23.696	2.45113	2,251/4,132	16.4819	1.97447	2001	1499	1388	1495	4427	23.488	2.39777	1,529/2,898	16.3109	1.94591	1502	975	892	1058
PFOS	5290	23.7205	2.46975	1,901/3,389	16.5059	2.00373	2001	1463	1826	1500	23.544	2.48171	488/1,012	16.4354	2.03048	1500	6790	23.7166	2.45866	2,404/4,386	16.5019	1.98375	2001	1463	1826	1500	4670	23.5102	2.40967	1,622/3,048	16.3292	1.95486	1502	955	1150	1063
PFNS	4843	23.691	2.46589	1,734/3,109	16.4722	1.99625	1997	1491	1355	413	23.0896	2.65902	138/275	16.0827	2.18375	413	5256	23.6864	2.46109	1,878/3,378	16.4779	1.99732	1997	1491	1355	413	3653	23.4694	2.40769	1,261/2,392	16.2982	1.96985	1498	974	872	309
Abbreviations: SD, standard deviation; SES, socioeconomic status.

## Sheet: Supplementary Table 6
Supplementary Table 6. Description and statistics of demographic and covariate data in the 6,131 participants with serum PFHpA concentration data.
Variable	Total sample (n = 6,131)	Discovery sample (n = 4,708)	Replication sample (n = 1,423)	Difference between discovery and replication samples
				T or chi-square value	P value
Age (mean ± SD, years)	23.68 ± 2.45	23.68 ± 2.46	23.71 ± 2.42	0.124358	0.724367
Sex (males/females)	2,129/4,002	1,661/3,047	468/955	2.75856	0.096735
Education (mean ± SD, years)	16.48 ± 1.98	16.47 ± 2.00	16.49 ± 1.91	0.132421	0.715948
Living city at recruitment (n)	21	20	15	NA	NA
Batch1 (n)	1971	1971	0	NA	NA
Batch2 (n)	1404	1404	0	NA	NA
Batch3 (n)	1333	1333	0	NA	NA
Batch4 (n)	1423	0	1423	NA	NA
PC1 (mean ± SD)	-1.59E-04 ± 0.01	-1.07E-03 ± 0.01	2.84E-03 ± 0.01	126.877	3.8158e-29
PC2 (mean ± SD)	-9.41E-05 ± 0.01	1.80E-04 ± 0.01	-1.00E-03 ± 0.01	10.9827	0.000925013
PC3 (mean ± SD)	-6.75E-05 ± 0.01	-2.07E-04 ± 0.01	3.94E-04 ± 0.01	2.60599	0.106512
PC4 (mean ± SD)	2.05E-05 ± 0.01	8.53E-05 ± 0.01	-1.94E-04 ± 0.01	0.58637	0.443856
PC5 (mean ± SD)	3.92E-05 ± 0.01	1.81E-04 ± 0.01	-4.31E-04 ± 0.01	2.97813	0.0844471
PC6 (mean ± SD)	3.58E-06 ± 0.01	1.69E-05 ± 0.01	-4.05E-05 ± 0.01	0.0255005	0.873131
PC7 (mean ± SD)	1.97E-05 ± 0.01	-9.44E-05 ± 0.01	3.97E-04 ± 0.01	1.86463	0.172142
PC8 (mean ± SD)	7.26E-05 ± 0.01	6.31E-05 ± 0.01	1.04E-04 ± 0.01	0.0133017	0.908185
PC9 (mean ± SD)	-6.62E-05 ± 0.01	2.64E-05 ± 0.01	-3.73E-04 ± 0.01	1.24423	0.2647
PC10 (mean ± SD)	-8.03E-05 ± 0.01	-1.04E-05 ± 0.01	-3.12E-04 ± 0.01	0.704754	0.401224
Abbreviations: PC, principal component; PFHpA, perfluoroheptanoic acid; SD, standard deviation.

## Sheet: Supplementary Table 7
Supplementary Table 7. Independent genome-wide significant genetic variants and loci associated with serum PFHpA concentration in the discovery and replication samples.
Chromosome	Genomic loci	Genetic variant	Position	Reference allele	Effect allele	AF	Info	Discovery sample (n = 4,708)				Replication sample (n = 1,423)
								Beta	SE	T value	P value	Beta	SE	T value	P value
3	3q29	rs71621224	195927524	CTT	C	0.13842	0.9397	-0.19537	0.032166	-6.0737	1.34803e-09	-0.16204	0.06036	-2.6845	0.00734852
3	3q29	rs62410541	195928215	C	G	0.084509	0.99815	-0.23564	0.03928	-5.9991	2.13304e-09	-0.21148	0.070288	-3.0088	0.00246932
3	3q29	rs9861052	195929099	G	A	0.42306	0.93359	0.14737	0.022748	6.4785	1.02141e-10	0.18813	0.041222	4.5637	5.45884e-06
3	3q29	rs78771288	195945977	A	G	0.33187	0.98583	0.19705	0.023193	8.4962	2.59418e-17	0.19588	0.042123	4.6501	3.62577e-06
3	3q29	rs1543975	195949655	T	C	0.55113	0.96806	-0.14193	0.022385	-6.3406	2.50323e-10	-0.17022	0.03975	-4.2823	1.97424e-05
3	3q29	rs17852687	195956827	T	C	0.80891	0.99691	0.20496	0.028024	7.3136	3.04089e-13	0.1665	0.051723	3.219	0.00131522
3	3q29	rs7641135	195957587	T	C	0.68681	0.92101	0.2168	0.024511	8.8452	1.27057e-18	0.18646	0.046602	4.001	6.63285e-05
3	3q29	rs58954032	195961123	C	T	0.12137	0.99313	-0.21905	0.033172	-6.6034	4.45656e-11	-0.24234	0.064363	-3.7652	0.000173221
3	3q29	rs147293878	195963973	C	CAG	0.066201	0.995	-0.26092	0.043909	-5.9424	3.01162e-09	-0.30779	0.080997	-3.8	0.000150765
3	3q29	rs77578374	195977756	T	C	0.7489	0.99137	0.20211	0.025482	7.9316	2.68534e-15	0.17023	0.047197	3.6068	0.000320701
3	3q29	rs13315396	196070309	T	C	0.13483	0.95158	-0.19401	0.032799	-5.9151	3.55059e-09	-0.12142	0.060161	-2.0182	0.0437623
3	3q29	rs145087918	196071333	A	G	0.77208	0.9469	0.17237	0.026827	6.4254	1.44511e-10	0.13627	0.050601	2.6931	0.00716143
6	6p22.2	rs2328895	25802083	C	T	0.81342	0.99953	0.19243	0.028182	6.8279	9.7051e-12	0.24828	0.047515	5.2253	1.99756e-07
6	6p22.2	rs56031214	25815213	A	T	0.084111	0.90717	0.25105	0.040694	6.1692	7.43704e-10	0.31248	0.073197	4.2691	2.09315e-05
6	6p22.2	6:25851469:ATT:AT	25851469	ATT	AT	0.16352	0.92079	0.24023	0.030246	7.9428	2.45471e-15	0.37837	0.055856	6.774	1.8281e-11
6	6p22.2	rs556339	25870745	C	T	0.16007	0.99959	0.29776	0.029426	10.119	7.96159e-24	0.38225	0.05227	7.313	4.3451e-13	none
6	6p22.2	rs115559258	25878214	G	A	0.074709	0.99168	0.3333	0.041045	8.1205	5.87489e-16	0.53908	0.073447	7.3396	3.58922e-13
6	6p22.2	rs71544655	25878282	C	CA	0.27392	0.98747	0.15911	0.024707	6.4397	1.31704e-10	0.25155	0.043213	5.8212	7.21107e-09
6	6p22.2	rs629444	25885814	C	T	0.11358	1	0.28289	0.034379	8.2286	2.42661e-16	0.37899	0.059253	6.3962	2.15576e-10
6	6p22.2	rs60645096	25980403	C	T	0.051872	0.99766	0.33222	0.048304	6.8776	6.88652e-12	0.37462	0.088593	4.2285	2.50265e-05
Note: The significant threshold is P < 3.85 × 10-9 in the discovery sample and P < 2.50 × 10-3 (Bonferroni correction for the 20 discovered associations) in the replication sample. The genetic variants that did not survive replication are shown in light grey. Abbreviations: AF, allele frequency of the effect allele; Info, information score in imputation quality; PFHpA, perfluoroheptanoic acid; SE…

## Sheet: Supplementary Table 8
Supplementary Table 8. Independent genome-wide significant genetic variants and loci associated with serum PFHpA concentration in the total sample.
Chromosome	Genomic loci	Genetic variant	Position	Reference allele	Effect allele	AF	Info	Total sample (n = 6,131)
								Beta	SE	T value	P value
3	3q29	rs71621224	195927524	CTT	C	0.13842	0.9397	-0.19179	0.028466	-6.7373	1.76198e-11
3	3q29	rs62410541	195928215	C	G	0.084509	0.99815	-0.23402	0.034391	-6.8047	1.10917e-11
3	3q29	rs9861052	195929099	G	A	0.42306	0.93359	0.15614	0.019979	7.8153	6.4121e-15
3	3q29	rs78771288	195945977	A	G	0.33187	0.98583	0.19553	0.020381	9.5939	1.20226e-21
3	3q29	rs1543975	195949655	T	C	0.55113	0.96806	-0.14902	0.019566	-7.616	3.01301e-14
3	3q29	rs17852687	195956827	T	C	0.80891	0.99691	0.19597	0.024715	7.9292	2.60016e-15
3	3q29	rs7641135	195957587	T	C	0.68681	0.92101	0.2104	0.021757	9.6703	5.78096e-22
3	3q29	rs58954032	195961123	C	T	0.12137	0.99313	-0.22684	0.029564	-7.6728	1.94536e-14
3	3q29	rs147293878	195963973	C	CAG	0.066201	0.995	-0.27493	0.038712	-7.1017	1.37088e-12
3	3q29	rs77578374	195977756	T	C	0.7489	0.99137	0.19508	0.02249	8.6741	5.2723e-18
3	3q29	rs13315396	196070309	T	C	0.13483	0.95158	-0.18025	0.028883	-6.2408	4.64408e-10
3	3q29	rs145087918	196071333	A	G	0.77208	0.9469	0.16657	0.023769	7.0077	2.67917e-12
6	6p22.2	rs2328895	25802083	C	T	0.81342	0.99953	0.20776	0.024324	8.5412	1.65577e-17
6	6p22.2	rs56031214	25815213	A	T	0.084111	0.90717	0.26818	0.035675	7.5173	6.39735e-14
6	6p22.2	6:25851469:ATT:AT	25851469	ATT	AT	0.16352	0.92079	0.26968	0.026686	10.106	8.01678e-24
6	6p22.2	rs556339	25870745	C	T	0.16007	0.99959	0.31919	0.025726	12.407	6.23735e-35
6	6p22.2	rs115559258	25878214	G	A	0.074709	0.99168	0.38073	0.035961	10.587	5.71479e-26
6	6p22.2	rs71544655	25878282	C	CA	0.27392	0.98747	0.18206	0.021525	8.4584	3.34965e-17
6	6p22.2	rs629444	25885814	C	T	0.11358	1	0.30739	0.029841	10.301	1.10917e-24
6	6p22.2	rs60645096	25980403	C	T	0.051872	0.99766	0.34127	0.042538	8.0227	1.23027e-15
Note: The significant threshold is P < 3.85 × 10-9. Abbreviations: AF, allele frequency of the effect allele; Info, information score in imputation quality; PFHpA, perfluoroheptanoic acid; SE, standard error.

## Sheet: Supplementary Table 9
Supplementary Table 9. Independent genome-wide significant genetic variants and loci associated with serum PFHpA concentration in the total sample (n = 3,350), additionally controlling for lifetime socioeconomic status, occupation, breastfeeding, urbanicity, air pollution (PM2.5), and serum levels of four heavy metals (chromium, nickel, arsenic and lead).
Chromosome	Genomic loci	Genetic variant	Position	Reference allele	Effect allele	AF	Info	Beta	SE	T value	P value
3	3q29	rs71621224	195927524	CTT	C	0.13842	0.9397	-0.2138	0.035891	-5.957	2.80092e-09
3	3q29	rs62410541	195928215	C	G	0.084509	0.99815	-0.26538	0.043827	-6.055	1.53922e-09
3	3q29	rs9861052	195929099	G	A	0.42306	0.93359	0.14611	0.025059	5.8306	5.97998e-09
3	3q29	rs78771288	195945977	A	G	0.33187	0.98583	0.18222	0.025562	7.1287	1.20504e-12
3	3q29	rs1543975	195949655	T	C	0.55113	0.96806	-0.13968	0.02457	-5.6849	1.4067e-08
3	3q29	rs17852687	195956827	T	C	0.80891	0.99691	0.22332	0.031237	7.1494	1.03992e-12
3	3q29	rs7641135	195957587	T	C	0.68681	0.92101	0.23392	0.027765	8.4249	5.04661e-17
3	3q29	rs58954032	195961123	C	T	0.12137	0.99313	-0.24233	0.037931	-6.3887	1.87413e-10
3	3q29	rs147293878	195963973	C	CAG	0.066201	0.995	-0.27715	0.048774	-5.6823	1.42758e-08
3	3q29	rs77578374	195977756	T	C	0.7489	0.99137	0.2274	0.028407	8.0051	1.57036e-15
3	3q29	rs13315396	196070309	T	C	0.13483	0.95158	-0.22569	0.035953	-6.2772	3.83178e-10
3	3q29	rs145087918	196071333	A	G	0.77208	0.9469	0.20059	0.029923	6.7034	2.33346e-11
6	6p22.2	rs2328895	25802083	C	T	0.81342	0.99953	0.23793	0.030279	7.8578	5.03501e-15
6	6p22.2	rs56031214	25815213	A	T	0.084111	0.90717	0.26227	0.045019	5.8257	6.15744e-09
6	6p22.2	6:25851469:ATT:AT	25851469	ATT	AT	0.16352	0.92079	0.25515	0.033827	7.5427	5.71479e-14
6	6p22.2	rs556339	25870745	C	T	0.16007	0.99959	0.30977	0.032808	9.4417	6.18016e-21
6	6p22.2	rs115559258	25878214	G	A	0.074709	0.99168	0.36352	0.045536	7.9832	1.87068e-15
6	6p22.2	rs71544655	25878282	C	CA	0.27392	0.98747	0.18259	0.027259	6.6984	2.41546e-11
6	6p22.2	rs629444	25885814	C	T	0.11358	1	0.29385	0.037859	7.7619	1.0666e-14
6	6p22.2	rs60645096	25980403	C	T	0.051872	0.99766	0.35309	0.054489	6.48	1.03371e-10
Note: The significant threshold is P < 3.85 × 10-9. The genetic variants that did not acheive significance are shown in light grey. Abbreviations: AF, allele frequency of the effect allele; Info, information score in imputation quality; PFHpA, perfluoroheptanoic acid; SE, standard error.

## Sheet: Supplementary Table 10
Supplementary Table 10. Protein-coding genes mapped by study-wide significant variants associated with PFHpA accumulation based on physical position
Gene Ensg ID	Gene Symbol	Chromosome	Start	End	Strand	min GWAS P-value
ENSG00000176945	MUC20	3	195447753	195467994	1	2.53046e-09
ENSG00000145113	MUC4	3	195473636	195539148	-1	6.42688e-17
ENSG00000061938	TNK2	3	195590235	195638816	-1	4.69894e-16
ENSG00000072274	TFRC	3	195754054	195809060	-1	1.27057e-18
ENSG00000163958	ZDHHC19	3	195924320	195938308	-1	1.27057e-18
ENSG00000163959	SLC51A	3	195938358	195970049	1	1.27057e-18
ENSG00000161217	PCYT1A	3	195941093	196014828	-1	1.27057e-18
ENSG00000272741	RP11-447L10.1	3	195975101	196045093	-1	2.68534e-15
ENSG00000213123	TCTEX1D2	3	196018090	196045170	-1	1.27057e-18
ENSG00000273331	TM4SF19	3	196042953	196065244	-1	1.23027e-14
ENSG00000145107	TM4SF19	3	196046213	196065374	-1	1.27057e-18
ENSG00000163960	UBXN7	3	196074533	196159345	-1	1.27057e-18
ENSG00000163961	RNF168	3	196195654	196230639	-1	2.97852e-15
ENSG00000185798	WDR53	3	196281056	196295545	-1	2.68534e-15
ENSG00000174004	NRROS	3	196366557	196388875	1	1.27057e-18
ENSG00000163964	PIGX	3	196366646	196462878	1	1.27057e-18
ENSG00000174007	CEP19	3	196433148	196439164	-1	5.14044e-17
ENSG00000180370	PAK2	3	196466728	196559518	1	1.27938e-14
ENSG00000079691	LRRC16A	6	25279306	25620758	1	5.99791e-19
ENSG00000146039	SLC17A4	6	25754927	25781419	1	1.1324e-19
ENSG00000124568	SLC17A1	6	25783125	25832287	-1	5.28445e-22
ENSG00000124564	SLC17A3	6	25833294	25882514	-1	7.96159e-24
ENSG00000112337	SLC17A2	6	25912982	25930946	-1	6.68344e-15
ENSG00000112343	TRIM38	6	25963030	25987384	1	7.96159e-24
ENSG00000124610	HIST1H1A	6	26017260	26018040	-1	2.39607e-09
ENSG00000198366	HIST1H3A	6	26020718	26021186	1	2.69153e-09
ENSG00000196176	HIST1H4A	6	26021907	26022278	1	2.69153e-09
ENSG00000124529	HIST1H4B	6	26027124	26027480	-1	3.30902e-09
ENSG00000124693	HIST1H3B	6	26031817	26032288	-1	7.96159e-24
ENSG00000137259	HIST1H2AB	6	26033320	26033796	-1	3.17395e-09
ENSG00000196226	HIST1H2BB	6	26043455	26043885	-1	3.17395e-09
ENSG00000196532	HIST1H3C	6	26045639	26046097	1	3.17395e-09
ENSG00000187837	HIST1H1C	6	26055968	26056699	-1	1.63305e-15
ENSG00000180596	HIST1H2BC	6	26115101	26124154	-1	5.99791e-19
ENSG00000180573	HIST1H2AC	6	26124373	26139344	1	7.96159e-24
ENSG00000158373	HIST1H2BD	6	26158349	26171577	1	7.96159e-24
ENSG00000197409	HIST1H3D	6	26197068	26199521	-1	3.30902e-09
ENSG00000196866	HIST1H2AD	6	26199079	26199471	-1	3.30902e-09
ENSG00000197846	HIST1H2BF	6	26199748	26200942	1	2.46037e-14
ENSG00000168274	HIST1H2AE	6	26217165	26217711	1	7.96159e-24
ENSG00000158406	HIST1H4H	6	26281283	26285762	-1	1.39637e-21
ENSG00000186470	BTN3A2	6	26365387	26378546	1	7.96159e-24
ENSG00000124508	BTN2A2	6	26383324	26395102	1	7.96159e-24
ENSG00000026950	BTN3A1	6	26402465	26415444	1	6.96627e-16
ENSG00000112763	BTN2A1	6	26458150	26476849	1	2.93765e-17
ENSG00000182952	HMGN4	6	26538633	26546482	1	7.96159e-24

[truncated: 13 more sheets: Supplementary Table 11, Supplementary Table 12, Supplementary Table 13, Supplementary Table 14, Supplementary Table 15, Supplementary Table 16, Supplementary Table 17, Supplementary Table 18, Supplementary Table 19, Supplementary Table 20, Supplementary Table 21, Supplementary Table 22, SheeSupplementary Table 23]
